# Supplementary material
Source: MDPI journal article supplement (https://www.mdpi.com/2073-4395/13/11/2842)
Supplement: s1 [file s1]

## Supplementary material

S1 Code section. Configuration file settings used in the example with one month of data (January 2021).

```
[import]

src = [
    "indata/2021/**/*.*.dat"
]

timestamp_col = "EPOCH_TIME"

[import.columns]
EPOCH_TIME = "float64"
solenoid_valves = "float16"
ALARM_STATUS = "int8"
CO2 = "float32"
N2O_dry = "float32"
CH4_dry = "float32"

[filters.__TIMESTAMP__]
min_value = "2021-01-01 00:00:01"
max_value = "2021-01-31 23:59:59"

[filters.ALARM_STATUS]
allow_only = [0, 4]
disallow = []

[measurements]
chamber_col = "solenoid_valves"
max_gap = 10 # 10 seconds
min_duration = "00:19:30"
max_duration = "00:24:30"

[chamber_labels]
1 = "RAS 1"
2 = "RAS 2"
3 = "RAS 3"
4 = "RAS 4"
5 = "RAS 5"
6 = "RAS 6"
7 = "RAS 7"
8 = "RAS 8"
9 = "RAS 9"
10 = "RAS 10"
11 = "RAS 11"
12 = "RAS 12"
13 = "RAS 13"
14 = "RAS 14"
15 = "RAS 15"

[fluxes]
gases = ["N2O_dry", "CH4_dry", "CO2"]
t0_delay = "00:06:10"
t0_margin = "00:02:00"
A = 0.25
```

Q = 4.16e-6

V = 50e-3

Figure S1. Fragment of the output data after calculating the volumetric flux with fluxes command.

| data_start | t0      | chamber_val | chamber_lab | gas     | c0        | vol_flux  |
|------------|---------|-------------|-------------|---------|-----------|-----------|
| 27:27,4    | 33:37,4 | 7           | RAS 7       | N2O_dry | 0,3300338 | 1,64E-06  |
| 27:27,4    | 33:37,4 | 7           | RAS 7       | CH4_dry | 2,4132714 | -1,69E-06 |
| 27:27,4    | 33:37,4 | 7           | RAS 7       | CO2     | 424,77641 | 0,0041118 |
| 51:26,5    | 57:36,5 | 9           | RAS 9       | N2O_dry | 0,3269602 | 2,51E-06  |
| 51:26,5    | 57:36,5 | 9           | RAS 9       | CH4_dry | 2,3178809 | -6,88E-06 |
| 51:26,5    | 57:36,5 | 9           | RAS 9       | CO2     | 417,94748 | 0,0102696 |
| 15:26,8    | 21:36,8 | 10          | RAS 10      | N2O_dry | 0,3310946 | 9,11E-07  |
| 15:26,8    | 21:36,8 | 10          | RAS 10      | CH4_dry | 2,1703534 | -4,07E-06 |
| 15:26,8    | 21:36,8 | 10          | RAS 10      | CO2     | 422,54909 | 0,0141031 |
| 39:25,1    | 45:35,1 | 11          | RAS 11      | N2O_dry | 0,3286364 | 2,84E-06  |
| 39:25,1    | 45:35,1 | 11          | RAS 11      | CH4_dry | 2,198592  | 9,68E-07  |
| 39:25,1    | 45:35,1 | 11          | RAS 11      | CO2     | 433,04235 | 0,0083728 |
| 03:26,1    | 09:36,1 | 12          | RAS 12      | N2O_dry | 0,3233077 | 4,44E-06  |
| 03:26,1    | 09:36,1 | 12          | RAS 12      | CH4_dry | 2,2650669 | -1,70E-06 |
| 03:26,1    | 09:36,1 | 12          | RAS 12      | CO2     | 435,01125 | 0,0057738 |
| 27:27,1    | 33:37,1 | 13          | RAS 13      | N2O_dry | 0,3162934 | 3,16E-06  |
| 27:27,1    | 33:37,1 | 13          | RAS 13      | CH4_dry | 2,3414638 | -3,28E-07 |
| 27:27,1    | 33:37,1 | 13          | RAS 13      | CO2     | 426,89046 | 0,0092592 |
| 51:26,3    | 57:36,3 | 14          | RAS 14      | N2O_dry | 0,3330736 | -1,72E-06 |
| 51:26,3    | 57:36,3 | 14          | RAS 14      | CH4_dry | 2,3197139 | 5,29E-06  |
| 51:26,3    | 57:36,3 | 14          | RAS 14      | CO2     | 427,14597 | 9,85E-05  |
| 15:24,9    | 21:34,9 | 15          | RAS 15      | N2O_dry | 0,3275981 | 1,84E-06  |
| 15:24,9    | 21:34,9 | 15          | RAS 15      | CH4_dry | 2,4127424 | -1,22E-06 |
| 15:24,9    | 21:34,9 | 15          | RAS 15      | CO2     | 433,2103  | 0,0103378 |
| 39:25,2    | 45:35,2 | 1           | RAS 1       | N2O_dry | 0,3338425 | -1,45E-06 |
| 39:25,2    | 45:35,2 | 1           | RAS 1       | CH4_dry | 2,1740399 | -6,14E-07 |
| 39:25,2    | 45:35,2 | 1           | RAS 1       | CO2     | 418,95824 | 0,00112   |
| 03:24,7    | 09:34,7 | 2           | RAS 2       | N2O_dry | 0,3240874 | 2,48E-06  |

S2 Code section. The commands in the command prompt for importing and transforming data into fluxes in Picarrito.

```
(venv) C:\>picarrito import
INFO          Reading database from 'picarrito\database.feather' (0.3 MiB).
Reading source files          [#####] 522/522
INFO          Database updated:
          Size in memory (MB)          Rows
Before                  0.0              0
New data                 48.9          2,229,120
After                   48.9          2,229,120

INFO          Saved database to 'picarrito\database.feather' (40.6 MiB).

(venv) C:\>picarrito fluxes
INFO          Reading database from 'picarrito\database.feather' (40.6 MiB).
INFO          Database has 2,229,120 rows.
INFO          Data excluded by filters:
          Number rejected  Share rejected
__TIMESTAMP__              2,117          0.1%
ALARM_STATUS                619          0.0%
```

```

All filters combined                2,736                0.1%
INFO      Filtered database has 2,226,384 rows.
INFO
Number of chunks  Average duration  Total duration
All chunks        4,966            00:06:17        21 days 15:31:32
Rejected chunks   3,839            00:01:05         2 days 21:38:29
Final measurements 1,127            00:23:57        18 days 17:53:03

Analyzing measurements [#####] 1127/1127
INFO      Estimated 3381 fluxes (N20_dry, CH4_dry, CO2) in 1127 measurements.
INFO      Saved fluxes to 'picarrito\fluxes.csv'.

```

**(venv) C:\>picarrito plot flux-fits**

```

INFO      Reading database from 'picarrito\database.feather' (40.6 MiB).
INFO      Database has 2,229,120 rows.
INFO      Data excluded by filters:
Number rejected Share rejected
__TIMESTAMP__      2,117                0.1%
ALARM_STATUS        619                0.0%
All filters combined 2,736                0.1%
INFO      Filtered database has 2,226,384 rows.
INFO
Number of chunks  Average duration  Total duration
All chunks        4,966            00:06:17        21 days 15:31:32
Rejected chunks   3,839            00:01:05         2 days 21:38:29
Final measurements 1,127            00:23:57        18 days 17:53:03
Plotting measurements [#####] 1127/1127

```

## Supplementary Materials S1. Solution to the differential equation.

Calculation of the first equation estimating the theoretical concentration profile derived using a mass balance:

$$Q'c_0 + FA = Qc(t) + V \frac{dc}{dt}.$$

With  $Q'c_0 + FA$  as the total input in the chamber when adding up the that goes out of the chamber to the analyzer  $Qc(t)$  and the accumulation  $V \frac{dc}{dt}$  of the gas over time.

Approximating  $Q' = Q$  and rearranging terms, we obtain a first-order ordinary differential equation:

$$\frac{dc}{dt} = \frac{Q}{V} (c_0 - c(t)) + F \frac{A}{V}.$$

Solving it and enforcing the initial condition where  $c(t_0) = c_0$  the solution is

$$c(t) = c_0 + F \frac{A}{Q} (1 - e^{-\frac{Q}{V}(t-t_0)}).$$
